# Supplementary material
Source: publisher site journal article supplement (https://www.dovepress.com/article/423868)
Supplement: Supplementary file 1 [file get_supplementary_file.php]

**Supplementary Material**

**Table 1. Drug groupings**

|  | **Generic** |
| --- | --- |
| **IV diuretics** | Furosemide |
|  | Bumetanide |
|  | Torsemide |
|  | Ethacrynic acid |
| **IV beta-blockers** | Esmolol |
|  | Atenolol |
|  | Metoprolol |
| **IV calcium-channel blockers** | Clevidipine |
|  | Nicardipine |
| **IV ACE-I/ARB** | Enalapril |
| **IV anticoagulants** | Heparin |
|  | Argatroban |
|  | Bivalirudin |
| **IV potassium** | KCl |
|  | K-acetate |
|  | K-phosphate |
| **Vasopressors** | Epinephrine |
|  | Norepinephrine |
|  | Vasopressin |
|  | Dopamine |
|  | Phenylephrine |
| **IV vasodilators** | Nitroprusside |
| **IV Inotropes** | Dobutamine |
|  | Milrinone |

**Table 2: Markers of severity**

|  | **CHF-L** | **%** | **CHF-H** | **%** |
| --- | --- | --- | --- | --- |
|  | **N = 135,204** | | **N = 166,468** | |
| Cardiogenic shock |  |  |  |  |
| ARF/MV | 0 | 0.00% | 3787 | 2.27% |
| Acute MI | 0 | 0.00% | 1028 | 0.62% |
| Acute renal failure | 0 | 0.00% | 69501 | 41.75% |
| Dialysis | 0 | 0.00% | 18135 | 10.89% |
| ICU admission | 0 | 0.00% | 16564 | 9.95% |
| Cardiac catheterization | 0 | 0.00% | 152 | 0.09% |
| PA catheter | 0 | 0.00% | 260 | 0.16% |
| Arterial line | 0 | 0.00% | 13 | 0.01% |
| IACD or pacemaker placement | 0 | 0.00% | 522 | 0.31% |
| Physiologic markers |  |  |  |  |
| Hypotension or vasopressor use |  |  |  |  |
| Hypoxemia | 0 | 0.00% | 20273 | 12.18% |
| Oliguria | 0 | 0.00% | 169 | 0.10% |
| Altered mental status | 0 | 0.00% | 1712 | 1.03% |
| Tachycardia | 0 | 0.00% | 5098 | 3.06% |
| Bradycardia | 0 | 0.00% | 7643 | 4.59% |

CHF-L = congestive heart failure low severity; CHF-H = congestive heart failure high severity; ARF = acute respiratory failure; MV = mechanical ventilation; MI = myocardial infarction; ICU = intensive care unit; PA = pulmonary artery; IACD = implantable cardioverter defibrillator

**Table 3. Stratified outcomes by age, gender, and prior hospitalization**

|  | **CHF-L** | **%** | **CHF-H** | **%** | **P-value** |
| --- | --- | --- | --- | --- | --- |
|  | **N = 135,204** | | **N = 166,468** | |  |
| Hospital mortality, % |  |  |  |  |  |
| Age >/= 65 | 277 | 0.31% | 2239 | 1.85% | <0.001 |
| Age < 65 | 25 | 0.06% | 295 | 0.65% | <0.001 |
| Male | 125 | 0.18% | 1317 | 1.46% | <0.001 |
| Female | 177 | 0.27% | 1217 | 1.59% | <0.001 |
| Prior hospitalization Y | 115 | 0.31% | 982 | 1.78% | <0.001 |
| Prior hospitalization N | 187 | 0.19% | 1552 | 1.40% | <0.001 |
| Hospital LOS, days |  |  |  |  |  |
| Age >/= 65 |  |  |  |  |  |
| Mean (SD) | 2.5 (1.0) |  | 2.8 (1.0) |  | <0.001 |
| Median [IQR] | 3 [2,3] |  | 3 [2, 4] |  | <0.001 |
| Age < 65 |  |  |  |  |  |
| Mean (SD) | 2.4 (1.0) |  | 2.6 (1.0) |  | <0.001 |
| Median [IQR] | 2 [2,3] |  | 3 [2,4] |  | <0.001 |
| Male |  |  |  |  |  |
| Mean (SD) | 2.4 (1.0) |  | 2.7 (1.0) |  | <0.001 |
| Median [IQR] | 2 [2,3] |  | 3 [2,4] |  | <0.001 |
| Female |  |  |  |  |  |
| Mean (SD) | 2.5 (1.0) |  | 2.8 (1.0) |  | <0.001 |
| Median [IQR] | 3 [2, 3] |  | 3 [2,4] |  | <0.001 |
| Prior hospitalization Y |  |  |  |  |  |
| Mean (SD) | 2.5 (1.0) |  | 2.7 (1.0) |  | <0.001 |
| Median [IQR] | 2 [2,3] |  | 3 [2,4] |  | <0.001 |
| Prior hospitalization N |  |  |  |  |  |
| Mean (SD) | 2.5 (1.0) |  | 2.7 (1.0) |  | <0.001 |
| Median [IQR] | 2 [2,3] |  | 3 [2,4] |  | <0.001 |
| Hospital costs, $ |  |  |  |  |  |
| Age >/= 65 |  |  |  |  |  |
| Mean (SD) | 6003 (5342) |  | 6756 (5496) |  | <0.001 |
| Median [IQR] | 5015 [3567, 6980] |  | 5701 [4101, 7852] |  | <0.001 |
| Age < 65 |  |  |  |  |  |
| Mean (SD) | 6412 (5967) |  | 7227 (7542) |  | <0.001 |
| Median [IQR] | 5150 [3567, 7426] |  | 5834 [4097, 8274] |  | <0.001 |
| Male |  |  |  |  |  |
| Mean (SD) | 6251 (6163) |  | 6977 (6562) |  | <0.001 |
| Median [IQR] | 5016 [3500, 7158] |  | 5701 [4050, 8009] |  | <0.001 |
| Female |  |  |  |  |  |
| Mean (SD) | 6018 (4834) |  | 6774 (5562) |  | <0.001 |
| Median [IQR] | 5097 [3636, 7081] |  | 5771 [4160, 7897] |  | <0.001 |
| Prior hospitalization Y |  |  |  |  |  |
| Mean (SD) | 5833 (4557) |  | 6780 (5966) |  | <0.001 |
| Median [IQR] | 4925 [3495, 6869] |  | 5702 [4078, 7862] |  | <0.001 |
| Prior hospitalization N |  |  |  |  |  |
| Mean (SD) | 6254 (5890) |  | 6936 (6201) |  | <0.001 |
| Median [IQR] | 5110 [3592, 7222] |  | 5750 [4112, 8004] |  | <0.001 |

CHF-L = congestive heart failure low severity; CHF-H = congestive heart failure high severity; SD = standard deviation; IQR = interquartile range; LOS = length of stay; Y = yes; N = no
